# Supplementary material for: Virtual Reality and Artificial Intelligence Paving the Future of Cardiac Interventions and Training, a Review of the Available Reviews
Source: Preprints.org preprint supplement (doi:10.20944/preprints202409.2055.v1), 2024-09-26
Supplement: Supplementary file 1 [file supplementary]

Supplementary tables:

| Table 1: Studies involving VR based training in cardiac surgery categorized by the anatomical scope | | | |
| --- | --- | --- | --- |
|  | Non-tissue based | Tissue based |  |
| Coronaries (7) | Yasuda[1]  Duffy[2]  Joyce[3] | Sharma[4]  Brandao[5]  Feins[6]  Nesbitt[7] |  |
| Aortic valve (1) | Russo[8] |  |  |
| Mitral valve (8) | Sardari[9]  Sardari[10]  Jebran[11]  Premyodhin[12]  Valdis 40 (dry vs. wet)[13]  Valdis 20 (no comparison)[14] | Joyce[15]  Tavlasoglu[16] |  |
| Perfusion and cardiopulmonary bypass (5) | Hicks[17]  Fouilloux [18] | Hermsen[19]  Luo[20]  Kenny[21] |  |
| Others (3) | Hermsen (Septal myomectomy)[22] | Spooner (Cardiac transplantation)[23]  Zhang (LVAD)[24] |  |
| Transesophageal echocardiography (2) | Arango [25]  Smelt[26] | |  |
| Cardiac catheter training (2) | Bettati et al, Brown et al [27, 28] | |  |

| Table 2:  Studies involving immersive VR in pediatric cardiac surgery categorized by the type of treated lesion. | |
| --- | --- |
| VSD surgical closure (2) | Ong et al (CT)[29]  Mendez (CMR)[30] |
| VSD hybrid closure (1) | Ghosh (CMR)[31] |
| Truncus (1) | Ong et al (CT)[29] |
| MAPCAs (1) | [Van de Woestijne](https://pubmed.ncbi.nlm.nih.gov/?term=van+de+Woestijne+PC&cauthor_id=34812684) (CT)[32] |
| DORV (1) | Ayerbe (CMR)[33] |
| Atrioventricular valves (1) | Pushparajah K (3D Echocardiography)[34]  [Nanchahal](https://journals.sagepub.com/doi/10.1177/02676591221137480?url_ver=Z39.88-2003&rfr_id=ori:rid:crossref.org&rfr_dat=cr_pub%20%200pubmed#con1) (SR) |
| Left Ventricular assist device (1) | Ramaswamy,(CT)[35] |
| Intralobar sequestration  Extralobar sequestration  Bronchogenic cysts (1) | Pelizzo (CT)[36] |
| Coronary revascularization in Kawasaki patient (1) | Sadeghi (CT)[37] |

| Table 3: Studies involving use of AI in cardiac care classified by scope of interest | |
| --- | --- |
| Overall (15) | Decision making: (1)  Muzio[38]  Preoperative and intraoperative risk factors: 3  Bodenhofer[39]  Fernandes[40]  Li[41]  Mortality: 5  Allyn [42]  Park[43]  Chang[44]  Fan [45]  Molina[46]  Postcardiac events 6  Karri[47]  Kim[48]  Aranda [49]  He [50]  Xue[51]  Luo[52] |
| Coronary (3) | Zea-Vera[53]  Gao [54]  Hu[55] |
| Heart Transplantation (7) | Kampaktsis[56]  Li[57]  Ayers[58]  Kampaktskis [59]  Shou[60]  Zhou[61]  Agasthi[62] |
| Transcatheter aortic valve replacement (7) | Hernandez-Suarez[63]  Agasthi[64]  Evertz[65]  Hasimbegovic[66]  Thalappillil[67]  Truong[68]  Kilic [69] |
| Mitral valve (1) | Jiang [70] |

**References of supplementary tables:**

1. Yasuda S, Van den Eynde J, Vandendriessche K, Masuda M, Meyns B, Oosterlinck W (2021) Implementation of a beating heart system for training in off-pump and minimally invasive coronary artery bypass. BMC Surg 21:26 . https://doi.org/10.1186/s12893-020-01023-z

2. Duffy MC, Ibrahim M, Lachapelle K (2019) Development of a saphenous vein harvest model for simulation-based assessment. J Thorac Cardiovasc Surg 157:1082–1089 . https://doi.org/10.1016/j.jtcvs.2018.07.042

3. Joyce DL, Lahr BD, Maltais S, Said SM, Stulak JM, Nuttall GA, Joyce LD (2018) Integration of simulation components enhances team training in cardiac surgery. J Thorac Cardiovasc Surg 155:2518-2524.e5 . https://doi.org/10.1016/j.jtcvs.2018.01.076

4. Sharma VJ, Barton C, Page S, Ganesh JS, Patel N, Pirone F, Lin Z, Kejriwal NK, El Gamel A, McCormack DJ, Meikle F (2021) Cardiac surgery simulation: a low‐cost feasible option in an Australasian setting. ANZ J Surg 91:2042–2046 . https://doi.org/10.1111/ans.17077

5. Brandão CM de A, Dallan LRP, Dinato FJ, Monteiro R, Fiorelli AI, Jatene FB (2021) Evaluation method of training simulation on biological models for cardiovascular surgery residents. J Card Surg 36:2247–2252 . https://doi.org/10.1111/jocs.15524

6. Feins RH, Burkhart HM, Conte J V., Coore DN, Fann JI, Hicks GL, Nesbitt JC, Ramphal PS, Schiro SE, Shen KR, Sridhar A, Stewart PW, Walker JD, Mokadam NA (2017) Simulation-Based Training in Cardiac Surgery. Ann Thorac Surg 103:312–321 . https://doi.org/10.1016/j.athoracsur.2016.06.062

7. Nesbitt JC, St Julien J, Absi TS, Ahmad RM, Grogan EL, Balaguer JM, Lambright ES, Deppen SA, Wu H, Putnam JB (2013) Tissue-based coronary surgery simulation: Medical student deliberate practice can achieve equivalency to senior surgery residents. J Thorac Cardiovasc Surg 145:1453–1459 . https://doi.org/10.1016/j.jtcvs.2013.02.048

8. Russo M, Koenigshofer M, Stoiber M, Werner P, Gross C, Kocher A, Laufer G, Moscato F, Andreas M (2020) Advanced three-dimensionally engineered simulation model for aortic valve and proximal aorta procedures. Interact Cardiovasc Thorac Surg 30:887–895 . https://doi.org/10.1093/icvts/ivaa026

9. Sardari Nia P, Daemen JHT, Maessen JG (2019) Development of a high-fidelity minimally invasive mitral valve surgery simulator. J Thorac Cardiovasc Surg 157:1567–1574 . https://doi.org/10.1016/j.jtcvs.2018.09.014

10. Sardari Nia P, Heuts S, Daemen J, Luyten P, Vainer J, Hoorntje J, Cheriex E, Maessen J (2016) Preoperative planning with three-dimensional reconstruction of patient’s anatomy, rapid prototyping and simulation for endoscopic mitral valve repair. Interact Cardiovasc Thorac Surg ivw308 . https://doi.org/10.1093/icvts/ivw308

11. Jebran A-F, Saha S, Waezi N, Al-Ahmad A, Niehaus H, Danner BC, Baraki H, Kutschka I (2019) Design and training effects of a physical reality simulator for minimally invasive mitral valve surgery. Interact Cardiovasc Thorac Surg 29:409–415 . https://doi.org/10.1093/icvts/ivz112

12. Premyodhin N, Mandair D, Ferng AS, Leach TS, Palsma RP, Albanna MZ, Khalpey ZI (2018) 3D printed mitral valve models: affordable simulation for robotic mitral valve repair. Interact Cardiovasc Thorac Surg 26:71–76 . https://doi.org/10.1093/icvts/ivx243

13. Valdis M, Chu MWA, Schlachta C, Kiaii B (2016) Evaluation of robotic cardiac surgery simulation training: A randomized controlled trial. J Thorac Cardiovasc Surg 151:1498-1505.e2 . https://doi.org/10.1016/j.jtcvs.2016.02.016

14. Valdis M, Chu MWA, Schlachta CM, Kiaii B (2015) Validation of a Novel Virtual Reality Training Curriculum for Robotic Cardiac Surgery a Randomized Trial. Innov Technol Tech Cardiothorac Vasc Surg 10:383–388 . https://doi.org/10.1097/imi.0000000000000222

15. Joyce DL, Dhillon TS, Caffarelli AD, Joyce DD, Tsirigotis DN, Burdon TA, Fann JI (2011) Simulation and skills training in mitral valve surgery. J Thorac Cardiovasc Surg 141:107–112 . https://doi.org/10.1016/j.jtcvs.2010.08.059

16. Tavlasoglu M, Durukan AB, Arslan Z, Kurkluoglu M, Amrahov A, Jahollari A (2013) Evaluation of Skill-Acquisition Process in Mitral Valve Repair Techniques: A Simulation-Based Study. J Surg Educ 70:318–325 . https://doi.org/10.1016/j.jsurg.2013.01.009

17. Hicks GL, Gangemi J, Angona RE, Ramphal PS, Feins RH, Fann JI (2011) Cardiopulmonary bypass simulation at the Boot Camp. J Thorac Cardiovasc Surg 141:284–292 . https://doi.org/10.1016/j.jtcvs.2010.03.019

18. Fouilloux V, Gsell T, Lebel S, Kreitmann B, Berdah S (2014) Assessment of team training in management of adverse acute events occurring during cardiopulmonary bypass procedure: a pilot study based on an animal simulation model (Fouilloux, Team training in cardiac surgery). Perfusion 29:44–52 . https://doi.org/10.1177/0267659113498922

19. Hermsen JL, Mohamadipanah H, Yang S, Wise B, Fiedler A, DiMusto P, Pugh C (2021) Multimodal Cardiopulmonary Bypass Skills Assessment Within a High-Fidelity Simulation Environment. Ann Thorac Surg 112:652–660 . https://doi.org/10.1016/j.athoracsur.2020.07.022

20. Luo X, Luo F, Li B, Li B, Tang Y, Sun H (2020) A tissue-based simulation model for cardiopulmonary bypass cannulation/decannulation training. Perfusion 35:680–686 . https://doi.org/10.1177/0267659120901675

21. Kenny L, Booth K, Freystaetter K, Wood G, Reynolds G, Rathinam S, Moorjani N (2018) Training cardiothoracic surgeons of the future: The UK experience. J Thorac Cardiovasc Surg 155:2526-2538.e2 . https://doi.org/10.1016/j.jtcvs.2018.01.088

22. Hermsen JL, Yang R, Burke TM, Dardas T, Jacobs LM, Verrier ED, Mokadam NA (2018) Development of a 3-D printing-based cardiac surgical simulation curriculum to teach septal myectomy. J Thorac Cardiovasc Surg 156:1139-1148.e3 . https://doi.org/10.1016/j.jtcvs.2017.09.136

23. Spooner AJ, Faulkner CM, Novick RJ, Kent WDT (2019) Optimizing Surgical Skills in Cardiac Surgery Residents with Cardiac Transplant in the High-Fidelity Porcine Model. Innov Technol Tech Cardiothorac Vasc Surg 14:37–42 . https://doi.org/10.1177/1556984519828016

24. Zhang L-F, Feng H-B, Yu Z-G, Jing S, Wan F (2018) Surgical Training Improves Performance in Minimally Invasive Left Ventricular Assist Device Implantation Without Cardiopulmonary Bypass. J Surg Educ 75:195–199 . https://doi.org/10.1016/j.jsurg.2017.06.029

25. Arango S, Gorbaty B, Tomhave N, Shervheim D, Buyck D, Porter ST, Iaizzo PA, Perry TE (2023) A High-Resolution Virtual Reality-Based Simulator to Enhance Perioperative Echocardiography Training. J Cardiothorac Vasc Anesth 37:299–305 . https://doi.org/10.1053/j.jvca.2022.09.004

26. Smelt J, Corredor C, Edsell M, Fletcher N, Jahangiri M, Sharma V (2015) Simulation-based learning of transesophageal echocardiography in cardiothoracic surgical trainees: A prospective, randomized study. J Thorac Cardiovasc Surg 150:22–25 . https://doi.org/10.1016/j.jtcvs.2015.04.032

27. Brown M, Krishnananthan N, Paul V (2022) Right heart catherisation – a virtual reality. Eur Heart J 43:2787 . https://doi.org/10.1093/eurheartj/ehac544.2787

28. Bettati P, Dormer JD, Young J, Shahedi M, Fei B (2021) Virtual reality assisted cardiac catheterization. 82 . https://doi.org/10.1117/12.2582097

29. Ong CS, Krishnan A, Huang CY, Spevak P, Vricella L, Hibino N, Garcia JR, Gaur L (2018) Role of virtual reality in congenital heart disease. Congenit Heart Dis 13:357–361 . https://doi.org/10.1111/chd.12587

30. Mendez A, Hussain T, Hosseinpour A-R, Valverde I (2019) Virtual reality for preoperative planning in large ventricular septal defects. Eur Heart J 40:1092–1092 . https://doi.org/10.1093/eurheartj/ehy685

31. Ghosh RM, Mascio CE, Rome JJ, Jolley MA, Whitehead KK (2021) Use of Virtual Reality for Hybrid Closure of Multiple Ventricular Septal Defects. JACC Case Reports 3:1579–1583 . https://doi.org/10.1016/j.jaccas.2021.07.033

32. van de Woestijne PC, Bakhuis W, Sadeghi AH, Peek JJ, Taverne YJHJ, Bogers AJJC (2021) 3D Virtual Reality Imaging of Major Aortopulmonary Collateral Arteries: A Novel Diagnostic Modality. World J Pediatr Congenit Hear Surg 12:765–772 . https://doi.org/10.1177/21501351211045064

33. Ayerbe VMC, Morales MLV, Rojas CJL, Cortés MLA (2020) Visualization of 3D Models Through Virtual Reality in the Planning of Congenital Cardiothoracic Anomalies Correction: An Initial Experience. World J Pediatr Congenit Hear Surg 11:627–629 . https://doi.org/10.1177/2150135120923618

34. Pushparajah K, Chu KYK, Deng S, Wheeler G, Gomez A, Kabir S, Schnabel JA, Simpson JM (2021) Virtual reality three-dimensional echocardiographic imaging for planning surgical atrioventricular valve repair. JTCVS Tech 7:269–277 . https://doi.org/10.1016/j.xjtc.2021.02.044

35. Ramaswamy R, Marimuthu S, Ramarathnam K, Vijayasekharan S, Rao KS, Balakrishnan K (2021) Virtual reality-guided left ventricular assist device implantation in pediatric patient: Valuable presurgical tool. Ann Pediatr Cardiol 14:388 . https://doi.org/10.4103/apc.apc_81_21

36. Pelizzo G, Costanzo S, Roveri M, Lanfranchi G, Vertemati M, Milani P, Zuccotti G, Cassin S, Panfili S, Rizzetto F, Campari A, Camporesi A, Calcaterra V (2022) Developing Virtual Reality Head Mounted Display (HMD) Set-Up for Thoracoscopic Surgery of Complex Congenital Lung MalFormations in Children. Children 9:50 . https://doi.org/10.3390/children9010050

37. Abjigitova D, Sadeghi AH, Peek JJ, Bekkers JA, Bogers AJJC, Mahtab EAF (2022) Virtual Reality in the Preoperative Planning of Adult Aortic Surgery: A Feasibility Study. J Cardiovasc Dev Dis 9:31 . https://doi.org/10.3390/jcdd9020031

38. Lo Muzio FP, Rozzi G, Rossi S, Luciani GB, Foresti R, Cabassi A, Fassina L, Miragoli M (2021) Artificial Intelligence Supports Decision Making during Open-Chest Surgery of Rare Congenital Heart Defects. J Clin Med 10:5330 . https://doi.org/10.3390/jcm10225330

39. Bodenhofer U, Haslinger-Eisterer B, Minichmayer A, Hermanutz G, Meier J (2021) Machine learning-based risk profile classification of patients undergoing elective heart valve surgery. Eur J Cardio-Thoracic Surg 60:1378–1385 . https://doi.org/10.1093/ejcts/ezab219

40. Fernandes MPB, Armengol de la Hoz M, Rangasamy V, Subramaniam B (2021) Machine Learning Models with Preoperative Risk Factors and Intraoperative Hypotension Parameters Predict Mortality After Cardiac Surgery. J Cardiothorac Vasc Anesth 35:857–865 . https://doi.org/10.1053/j.jvca.2020.07.029

41. Li Y, Xu J, Wang Y, Zhang Y, Jiang W, Shen B, Ding X (2020) A novel machine learning algorithm, Bayesian networks model, to predict the high‐risk patients with cardiac surgery‐associated acute kidney injury. Clin Cardiol 43:752–761 . https://doi.org/10.1002/clc.23377

42. Allyn J, Allou N, Augustin P, Philip I, Martinet O, Belghiti M, Provenchere S, Montravers P, Ferdynus C (2017) A Comparison of a Machine Learning Model with EuroSCORE II in Predicting Mortality after Elective Cardiac Surgery: A Decision Curve Analysis. PLoS One 12:e0169772 . https://doi.org/10.1371/journal.pone.0169772

43. Park J, Bonde PN (2022) Machine Learning in Cardiac Surgery: Predicting Mortality and Readmission. ASAIO J 68:1490–1500 . https://doi.org/10.1097/MAT.0000000000001696

44. Chang Junior J, Binuesa F, Caneo LF, Turquetto ALR, Arita ECTC, Barbosa AC, Fernandes AM da S, Trindade EM, Jatene FB, Dossou P-E, Jatene MB (2020) Improving preoperative risk-of-death prediction in surgery congenital heart defects using artificial intelligence model: A pilot study. PLoS One 15:e0238199 . https://doi.org/10.1371/journal.pone.0238199

45. Fan Y, Dong J, Wu Y, Shen M, Zhu S, He X, Jiang S, Shao J, Song C (2022) Development of machine learning models for mortality risk prediction after cardiac surgery. Cardiovasc Diagn Ther 12:12–23 . https://doi.org/10.21037/cdt-21-648

46. Molina RS, Molina-Rodríguez MA, Rincón FM, Maldonado JD (2022) Cardiac Operative Risk in Latin America: A Comparison of Machine Learning Models vs EuroSCORE-II. Ann Thorac Surg 113:92–99 . https://doi.org/10.1016/j.athoracsur.2021.02.052

47. Karri R, Kawai A, Thong YJ, Ramson DM, Perry LA, Segal R, Smith JA, Penny-Dimri JC (2021) Machine Learning Outperforms Existing Clinical Scoring Tools in the Prediction of Postoperative Atrial Fibrillation During Intensive Care Unit Admission After Cardiac Surgery. Hear Lung Circ 30:1929–1937 . https://doi.org/10.1016/j.hlc.2021.05.101

48. Kim RB, Alge OP, Liu G, Biesterveld BE, Wakam G, Williams AM, Mathis MR, Najarian K, Gryak J (2022) Prediction of postoperative cardiac events in multiple surgical cohorts using a multimodal and integrative decision support system. Sci Rep 12:11347 . https://doi.org/10.1038/s41598-022-15496-w

49. Aranda‐Michel E, Sultan I, Kilic A, Bianco V, Brown JA, Serna‐Gallegos D (2022) A machine learning approach to model for end‐stage liver disease score in cardiac surgery. J Card Surg 37:29–38 . https://doi.org/10.1111/jocs.16076

50. He K, Liang W, Liu S, Bian L, Xu Y, Luo C, Li Y, Yue H, Yang C, Wu Z (2022) Long-term single-lead electrocardiogram monitoring to detect new-onset postoperative atrial fibrillation in patients after cardiac surgery. Front Cardiovasc Med 9: . https://doi.org/10.3389/fcvm.2022.1001883

51. Xue X, Chen W, Chen X (2022) A Novel Radiomics-Based Machine Learning Framework for Prediction of Acute Kidney Injury-Related Delirium in Patients Who Underwent Cardiovascular Surgery. Comput Math Methods Med 2022:1–16 . https://doi.org/10.1155/2022/4242069

52. Luo L, Huang SQ, Liu C, Liu Q, Dong S, Yue Y, Liu KZ, Huang L, Wang SJ, Li HY, Zheng S, Wu ZK (2022) Machine Learning–Based Risk Model for Predicting Early Mortality After Surgery for Infective Endocarditis. J Am Heart Assoc 11: . https://doi.org/10.1161/JAHA.122.025433

53. Zea-Vera R, Ryan CT, Havelka J, Corr SJ, Nguyen TC, Chatterjee S, Wall MJ, Coselli JS, Rosengart TK, Ghanta RK (2022) Machine Learning to Predict Outcomes and Cost by Phase of Care After Coronary Artery Bypass Grafting. Ann Thorac Surg 114:711–719 . https://doi.org/10.1016/j.athoracsur.2021.08.040

54. Gao Y, Liu X, Wang L, Wang S, Yu Y, Ding Y, Wang J, Ao H (2022) Machine learning algorithms to predict major bleeding after isolated coronary artery bypass grafting. Front Cardiovasc Med 9: . https://doi.org/10.3389/fcvm.2022.881881

55. Hu L-H, Betancur J, Sharir T, Einstein AJ, Bokhari S, Fish MB, Ruddy TD, Kaufmann PA, Sinusas AJ, Miller EJ, Bateman TM, Dorbala S, Di Carli M, Germano G, Commandeur F, Liang JX, Otaki Y, Tamarappoo BK, Dey D, Berman DS, Slomka PJ (2020) Machine learning predicts per-vessel early coronary revascularization after fast myocardial perfusion SPECT: results from multicentre REFINE SPECT registry. Eur Hear J - Cardiovasc Imaging 21:549–559 . https://doi.org/10.1093/ehjci/jez177

56. Kampaktsis PN, Siouras A, Doulamis IP, Moustakidis S, Emfietzoglou M, Van den Eynde J, Avgerinos D V., Giannakoulas G, Alvarez P, Briasoulis A (2023) Machine learning‐based prediction of mortality after heart transplantation in adults with congenital heart disease: A UNOS database analysis. Clin Transplant 37: . https://doi.org/10.1111/ctr.14845

57. Li T, Yang Y, Huang J, Chen R, Wu Y, Li Z, Lin G, Liu H, Wu M (2022) Machine learning to predict post-operative acute kidney injury stage 3 after heart transplantation. BMC Cardiovasc Disord 22:1–9 . https://doi.org/10.1186/s12872-022-02721-7

58. Ayers B, Sandholm T, Gosev I, Prasad S, Kilic A (2021) Using machine learning to improve survival prediction after heart transplantation. J Card Surg 36:4113–4120 . https://doi.org/10.1111/jocs.15917

59. Kampaktsis PN, Tzani A, Doulamis IP, Moustakidis S, Drosou A, Diakos N, Drakos SG, Briasoulis A (2021) State‐of‐the‐art machine learning algorithms for the prediction of outcomes after contemporary heart transplantation: Results from the UNOS database. Clin Transplant 35: . https://doi.org/10.1111/ctr.14388

60. Shou BL, Chatterjee D, Russel JW, Zhou AL, Florissi IS, Lewis T, Verma A, Benharash P, Choi CW (2022) Pre-operative Machine Learning for Heart Transplant Patients Bridged with Temporary Mechanical Circulatory Support. J Cardiovasc Dev Dis 9:311 . https://doi.org/10.3390/jcdd9090311

61. Zhou Y, Chen S, Rao Z, Yang D, Liu X, Dong N, Li F (2021) Prediction of 1-year mortality after heart transplantation using machine learning approaches: A single-center study from China. Int J Cardiol 339:21–27 . https://doi.org/10.1016/j.ijcard.2021.07.024

62. Agasthi P, Buras MR, Smith SD, Golafshar MA, Mookadam F, Anand S, Rosenthal JL, Hardaway BW, DeValeria P, Arsanjani R (2020) Machine learning helps predict long-term mortality and graft failure in patients undergoing heart transplant. Gen Thorac Cardiovasc Surg 68:1369–1376 . https://doi.org/10.1007/s11748-020-01375-6

63. Hernandez-Suarez DF, Kim Y, Villablanca P, Gupta T, Wiley J, Nieves-Rodriguez BG, Rodriguez-Maldonado J, Feliu Maldonado R, da Luz Sant’Ana I, Sanina C, Cox-Alomar P, Ramakrishna H, Lopez-Candales A, O’Neill WW, Pinto DS, Latib A, Roche-Lima A (2019) Machine Learning Prediction Models for In-Hospital Mortality After Transcatheter Aortic Valve Replacement. JACC Cardiovasc Interv 12:1328–1338 . https://doi.org/10.1016/j.jcin.2019.06.013

64. Agasthi P, Ashraf H, Pujari SH, Girardo ME, Tseng A, Mookadam F, Venepally NR, Buras M, Khetarpal BK, Allam M, Eleid MF, Greason KL, Beohar N, Siegel RJ, Sweeney J, Fortuin FD, Holmes DR, Arsanjani R (2021) Artificial Intelligence Trumps TAVI2-SCORE and CoreValve Score in Predicting 1-Year Mortality Post-Transcatheter Aortic Valve Replacement. Cardiovasc Revascularization Med 24:33–41 . https://doi.org/10.1016/j.carrev.2020.08.010

65. Evertz R, Lange T, Backhaus SJ, Schulz A, Beuthner BE, Topci R, Toischer K, Puls M, Kowallick JT, Hasenfuß G, Schuster A (2022) Artificial Intelligence Enabled Fully Automated CMR Function Quantification for Optimized Risk Stratification in Patients Undergoing Transcatheter Aortic Valve Replacement. J Interv Cardiol 2022:1–9 . https://doi.org/10.1155/2022/1368878

66. Hasimbegovic E, Papp L, Grahovac M, Krajnc D, Poschner T, Hasan W, Andreas M, Gross C, Strouhal A, Delle-Karth G, Grabenwöger M, Adlbrecht C, Mach M (2021) A Sneak-Peek into the Physician’s Brain: A Retrospective Machine Learning-Driven Investigation of Decision-Making in TAVR versus SAVR for Young High-Risk Patients with Severe Symptomatic Aortic Stenosis. J Pers Med 11:1062 . https://doi.org/10.3390/jpm11111062

67. Thalappillil R, Datta P, Datta S, Zhan Y, Wells S, Mahmood F, Cobey FC (2020) Artificial Intelligence for the Measurement of the Aortic Valve Annulus. J Cardiothorac Vasc Anesth 34:65–71 . https://doi.org/10.1053/j.jvca.2019.06.017

68. Truong VT, Beyerbach D, Mazur W, Wigle M, Bateman E, Pallerla A, Ngo TNM, Shreenivas S, Tretter JT, Palmer C, Kereiakes DJ, Chung ES (2021) Machine learning method for predicting pacemaker implantation following transcatheter aortic valve replacement. Pacing Clin Electrophysiol 44:334–340 . https://doi.org/10.1111/pace.14163

69. Kilic A, Goyal A, Miller JK, Gleason TG, Dubrawksi A (2021) Performance of a Machine Learning Algorithm in Predicting Outcomes of Aortic Valve Replacement. Ann Thorac Surg 111:503–510 . https://doi.org/10.1016/j.athoracsur.2020.05.107

70. Jiang H, Liu L, Wang Y, Ji H, Ma X, Wu J, Huang Y, Wang X, Gui R, Zhao Q, Chen B (2021) Machine Learning for the Prediction of Complications in Patients After Mitral Valve Surgery. Front Cardiovasc Med 8: . https://doi.org/10.3389/fcvm.2021.771246
